# Supplementary material for: Gut bacteria differentially affect egg production in the anautogenous mosquito Aedes aegypti and facultatively autogenous mosquito Aedes atropalpus (Diptera: Culicidae)
Source: PubMed Central journal article supplement (PMC4929711; doi:10.1186/s13071-016-1660-9), 2016-06-30
Supplement: 13071_2016_1660_MOESM1_ESM.pdf [file 13071_2016_1660_MOESM1_ESM.pdf]

1 **Supporting Information**

2

3 **Fig. S1.** Axenic *A. aegypti* and *A. atropalpus* first instars rapidly ingested bacteria.  
4 Conventional first instars were hatched in open containers containing distilled water and  
5 sterilized diet (Non-sterile). Axenic first instars were hatched in fully sterile conditions  
6 and fed sterilized diet (Axenic). Other axenic larvae were fed sterilized diet plus the  
7 indicated bacterial isolate. For each treatment, DNA was isolated from a pooled sample  
8 of 10 larvae that was collected 6 h post-inoculation after repeated washing and surface  
9 sterilization per Coon *et al.* [21]. DNA was also isolated from cultures of each bacterial  
10 isolate. DNA samples were then used as templates with universal or genus-specific  
11 primers (see Methods and Table S2). The agarose gel shows ethidium bromide stained  
12 PCR products. Lane 1, molecular mass markers labeled in base pairs (bp); Lane 2,  
13 universal primers plus DNA from conventional larvae; Lane 3, universal primers plus  
14 DNA from axenic larvae; Lane 3-4, *Chryseobacterium*-specific primers plus template  
15 from *Chryseobacterium* (Control) or axenic first instars inoculated with  
16 *Chryseobacterium* (Larva). The same treatments are then shown for *Sphingobacterium*  
17 (Lanes 5-6), *Microbacterium* (Lanes 7-8), *Leucobacter* (Lanes 9-10), *Paenibacillus*  
18 (Lanes 11-12), *Aquitalea* (Lanes 13-14), and *Comamonas* (Lanes 15-16). This  
19 experiment was repeated four times with independently collected samples and each  
20 time yielded identical outcomes for both *A. aegypti* and *A. atropalpus*.

21

22 **Figure S1.**

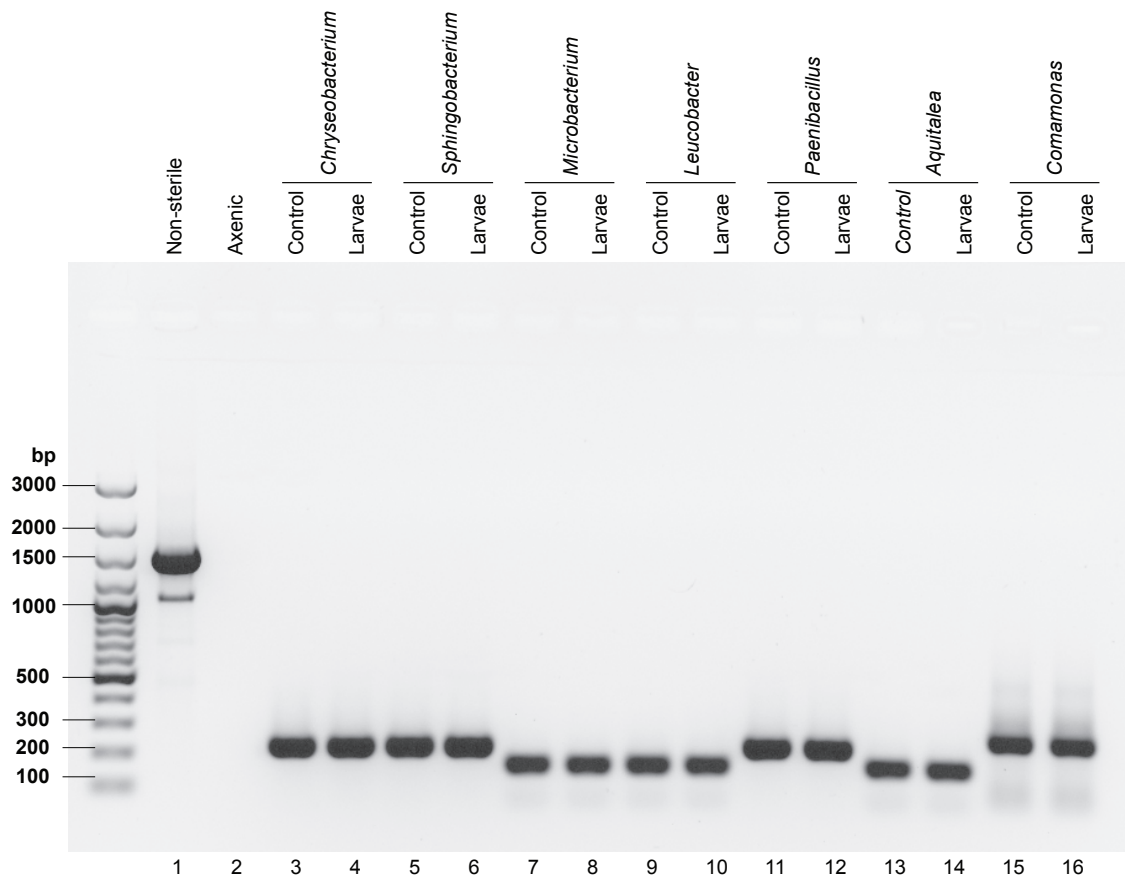

23

24

25 **Table S1.** Bacterial isolates used in the study.

| <b>Mosquito species isolate was collected from</b> | <b>Colony color and morphology</b> | <b>Culture medium</b> | <b>Genus</b>            |
|----------------------------------------------------|------------------------------------|-----------------------|-------------------------|
| <i>A. aegypti</i>                                  | White/pink + sec                   | Nutrient agar (BHI)   | <i>Paenibacillus</i>    |
| <i>A. aegypti</i>                                  | Yellow                             | Nutrient agar (BHI)   | <i>Chryseobacterium</i> |
| <i>A. aegypti</i>                                  | White                              | Nutrient agar (BHI)   | <i>Sphingobacterium</i> |
| <i>A. aegypti</i>                                  | White (small)                      | Blood agar (TSA base) | <i>Microbacterium</i>   |
| <i>A. aegypti</i>                                  | White (small)                      | Nutrient agar (BHI)   | <i>Leucobacter</i>      |
| <i>A. atropalpus</i>                               | Green                              | R2A                   | <i>Aquitalea</i>        |
| <i>A. atropalpus</i>                               | White (small) + sec                | R2A                   | <i>Comamonas</i>        |

26

27

28 **Table S2.** Primers designed and used during the study.

| Name                                        | Sequence              | Target gene | Target                      | Tm (°C) | Reference |
|---------------------------------------------|-----------------------|-------------|-----------------------------|---------|-----------|
| General primers (product > 300 bp)          |                       |             |                             |         |           |
| 27F                                         | GAGAGTTTGATCCTGGCTCAG | 16S rRNA    | Most bacteria               | 50      | 1         |
| 1492R                                       | GGTTACCTTGTTACGACTT   | 16S rRNA    | Most bacteria               | 50      | 1         |
| 1492F                                       | AAGTCGTAACAAGGTAACC   | 16S rRNA    | Most bacteria               | 55      | 1         |
| 129R                                        | GGTTBCCCCATTCRG       | 23S rRNA    | Most bacteria               | 55      | 2         |
| Quantitative PCR primers (product < 300 bp) |                       |             |                             |         |           |
| *HDA1                                       | ACTCCTACGGGAGGCAGCAGT | 16S rRNA    | Most bacteria               | 55      | 3         |
| *HDA2                                       | GTATTACCGCGGCTGCTGGCA | 16S rRNA    | Most bacteria               | 55      | 3         |
| Aqui-qF                                     | GTTGAGCACTCTAATGGGAC  | 16S-23S ITS | <i>Aquitalea</i> sp.        | 55      |           |
| Aqui-qR                                     | TCGGTTTTATGAGATTGGCT  | 16S-23S ITS | <i>Aquitalea</i> sp.        | 55      |           |
| Chryseo-qF                                  | GAAACTGCCATTGATACTGC  | 16S-23S ITS | <i>Chryseobacterium</i> sp. | 55      |           |
| Chryseo-qR                                  | CCCAAAAACGAGTTAGCATC  | 16S-23S ITS | <i>Chryseobacterium</i> sp. | 55      |           |
| Coma-qF                                     | GAGTCGAAAATCAGCGTTGC  | 16S-23S ITS | <i>Comamonas</i> sp.        | 55      |           |
| Coma-qR                                     | GCACAAGAACCCAAGCAACT  | 16S-23S ITS | <i>Comamonas</i> sp.        | 55      |           |
| Micro-qF                                    | AACTAGTTGTGGGTCCA     | 16S-23S ITS | <i>Microbacterium</i> sp.   | 55      |           |
| Micro-qR                                    | TGTATGTCAAGCCTTGGTAA  | 16S-23S ITS | <i>Microbacterium</i> sp.   | 55      |           |
| Paeni-qF                                    | TAGGTGTTGGGGATTTCGAT  | 16S-23S ITS | <i>Paenibacillus</i> sp.    | 55      |           |
| Paeni-qR                                    | CACCTGTCTCCTCTGTCC    | 16S-23S ITS | <i>Paenibacillus</i> sp.    | 55      |           |

\*Universal primers were used for qPCR analysis of *Sphingobacterium*- and *Leucobacter*-associated mosquitoes

1. Lane DJ. 16S/23S rRNA sequencing. In: Stackebrandt E, Goodfellow M, editors. Nucleic acid techniques in bacterial systematics. New York:John Wiley and Sons; 1991. p. 115-175.

2. Gurtler V, Stanisich VA. New approaches to typing and identification of bacteria using the 16S-23S rDNA spacer region. Microbiology. 1996;142:3-16.

3. Walter J, Tannock GW, Tilsala-Timisjarvi A, Rodtong S, Loach DM, Munro K, Alatossava T. Detection and identification of gastrointestinal *Lactobacillus* species by using denaturing gradient gel electrophoresis and species-specific PCR primers. Appl Environ Microbiol. 2000;66:297-303.

29

30
